# Supplementary material for: Amorphous poly-N-vinylcarbazole polymer as a novel matrix for the determination of low molecular weight compounds by MALDI-TOF MS
Source: Royal Society of Chemistry journal article supplement (doi:10.1039/d2ra01602h), 2022-01-01
Supplement: d2ra01602h1.pdf [file d2ra01602h1.pdf]

## Supporting information

### **Amorphous Poly-N-vinylcarbazole polymer as a novel matrix for determination of low molecular weight compounds by MALDI-TOF MS**

Xiu-Ying Chen,<sup>a,b,c</sup> Yong-hui Wang,<sup>b</sup> Shu-Yue Ren,<sup>b</sup> Shuang Li,<sup>b</sup> Yu Wang,<sup>b</sup> Kang Qin,<sup>b</sup> Sen Li,<sup>b</sup> Dian-Peng Han,<sup>b</sup> Yuan Peng,<sup>b</sup> Tie Han,<sup>b</sup> Zhi-Xian Gao,<sup>b</sup> Bao-Xiang Gao,<sup>a\*</sup> Huan-ying Zhou<sup>b\*</sup>

a. Key Laboratory of Medicinal Chemistry and Molecular Diagnosis, College of chemical and environmental sciences, Hebei University, Baoding 071002, China

b. Tianjin Key Laboratory of Risk Assessment and Control Technology for Environment and Food Safety, Tianjin Institute of Environmental and Operational Medicine, Tianjin 300050, China

c. Nanpu Development Zone Administrative Examination and approval Bureau, Tangshan 063305, China

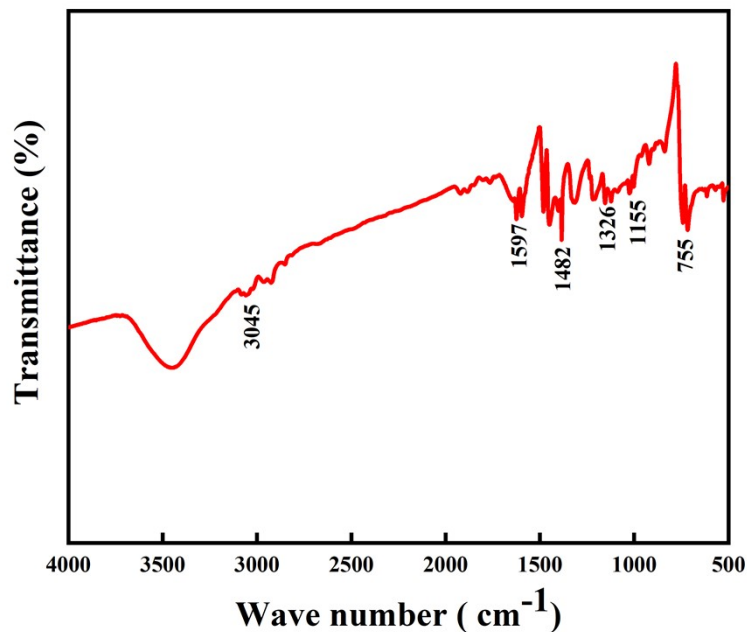

Fig. S1 Fourier-transform infrared spectroscopy of PVK

C–H stretching vibration peaks in aromatic rings ( $3045\text{ cm}^{-1}$ ), and those in aliphatic groups ( $2800 - 2970\text{ cm}^{-1}$ ). C = C vibration peak in benzene ring skeleton ( $1597$  and  $1482\text{ cm}^{-1}$ ). The C–N Tensile vibration peak in carbazole ring ( $1326\text{ cm}^{-1}$ ) and the C–H out of plane bending vibration peak of benzene ring ( $745\text{ cm}^{-1}$ ). C–C tensile vibration peak ( $1155\text{ cm}^{-1}$ ) in benzene ring skeleton, and the position of each peak is consistent with the literature<sup>29</sup>.

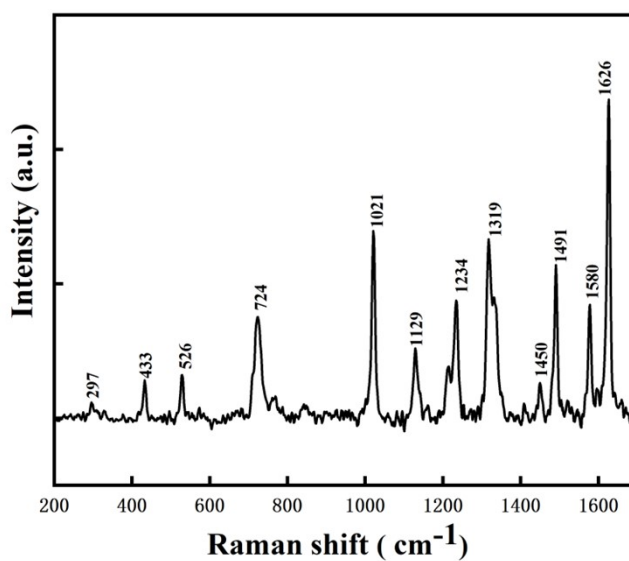

Fig. S2 The Raman spectra of PVK

Table S1 Raman vibrational frequencies (cm<sup>-1</sup>) of PVK and the vibrational assignments

| Raman spectra in the molecular powder state of PVK | Ascription                                                                     |
|----------------------------------------------------|--------------------------------------------------------------------------------|
| 297(w)                                             | CCC deformation vibration in long polyethylene chains                          |
| 433(w)                                             | Out of plane deformation and vibration of o-bis-p-benzene ring                 |
| 526(m)                                             | Out of plane deformation and vibration of o-bis-p-benzene ring                 |
| 724(m)                                             | Methylene in-plane rocking twisting vibration in long polyethylene chains      |
| 1021(s)                                            | Methylene in-plane rocking twisting vibration in long polyethylene chains      |
| 1129(w)                                            | In plane deformation and vibration of C-H in o-di-p-benzene ring               |
| 1234(m)                                            | Out-of-plane rocking vibration of methylene groups in long polyethylene chains |
| 1319(s)                                            | Methylene in-plane rocking twisting vibration in long polyethylene chains      |
| 1450(w)                                            | HCH deformation vibration in long polyethylene chains                          |
| 1491(m)                                            | Heteropentacyclic ring stretching vibration                                    |
| 1580(m)                                            | O-bis-substituted para-phenyl ring stretching vibration                        |
| 1626(s)                                            | O-bis-substituted para-phenyl ring stretching vibration                        |

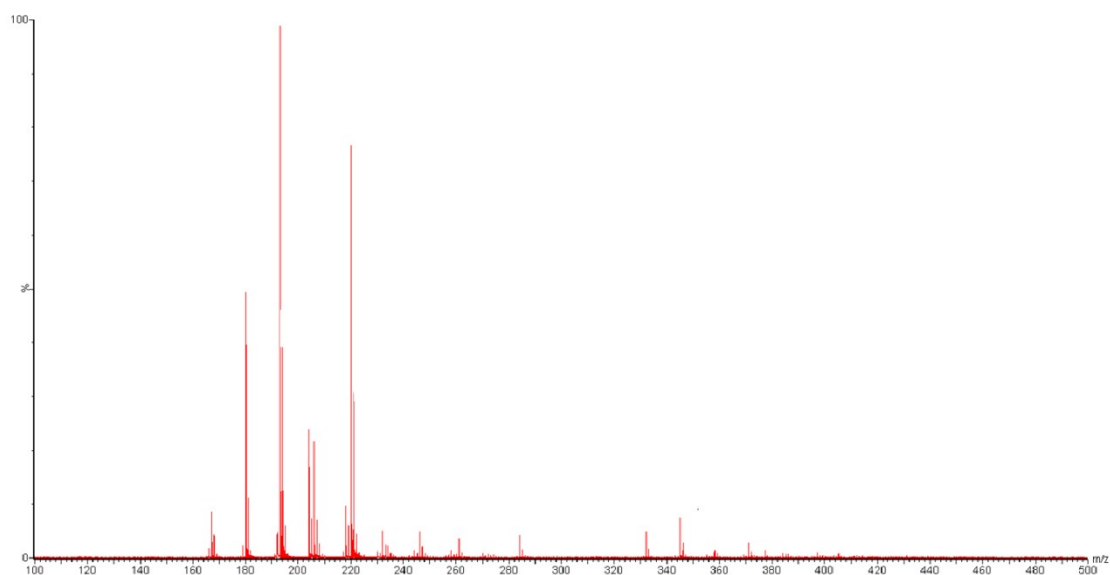

Fig.S3 LDI MS spectrum of purification PVK in positive ion mode

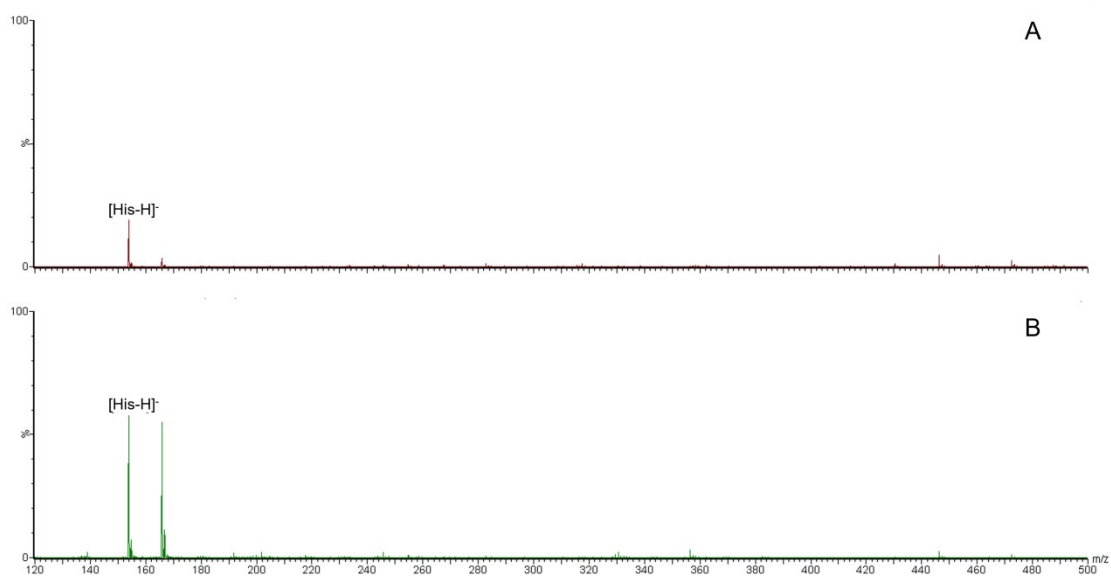

Fig. S4 Comparison of mass spectra of different solvents (A) THF, and (B) DCM dissolved matrix PVK for histidine detection by MALDI-TOF MS in negative ion mode

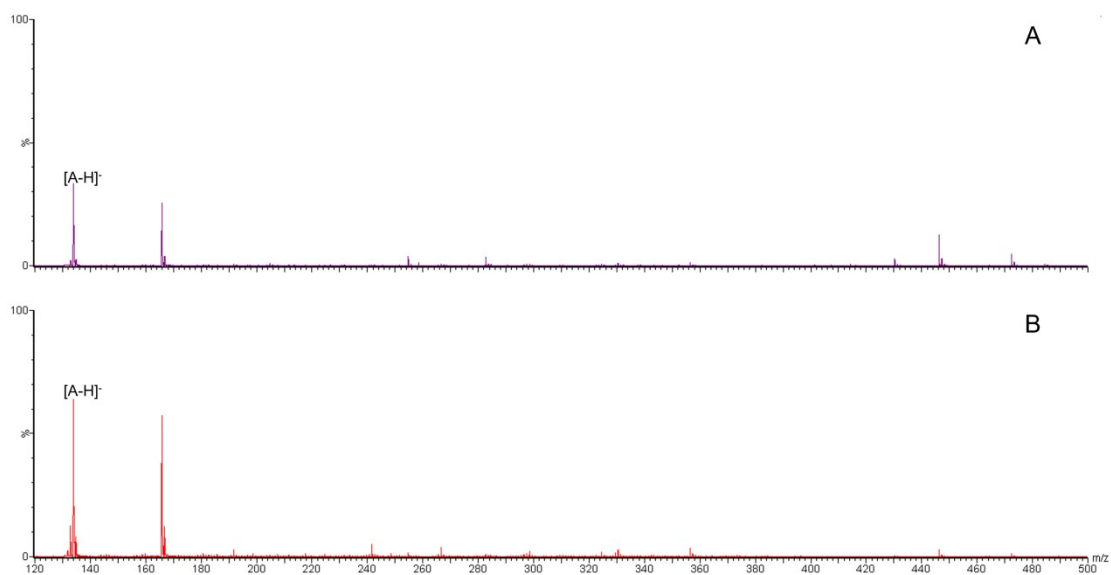

Fig. S5 Comparison of mass spectra of different solvents (A) THF, and (B) DCM dissolved matrix PVK for adenine detection by MALDI-TOF MS in negative ion mode

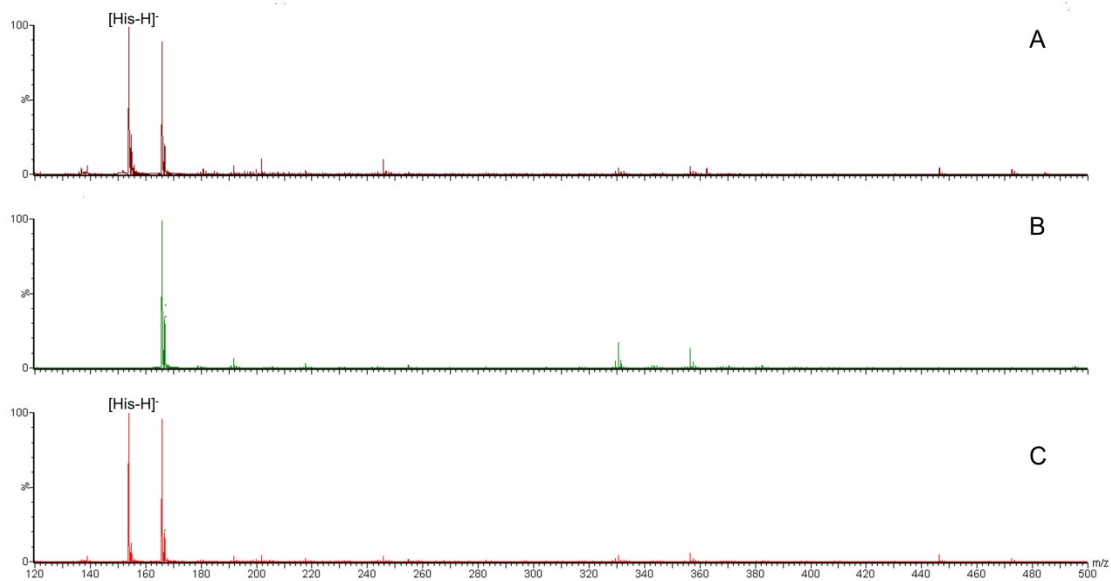

Fig. S6 MALDI-TOF MS spectrum of histidine with different spotting method included the sample first technique (A) the matrix first technique (B), and the dried-droplet technique (C) in negative ion mode

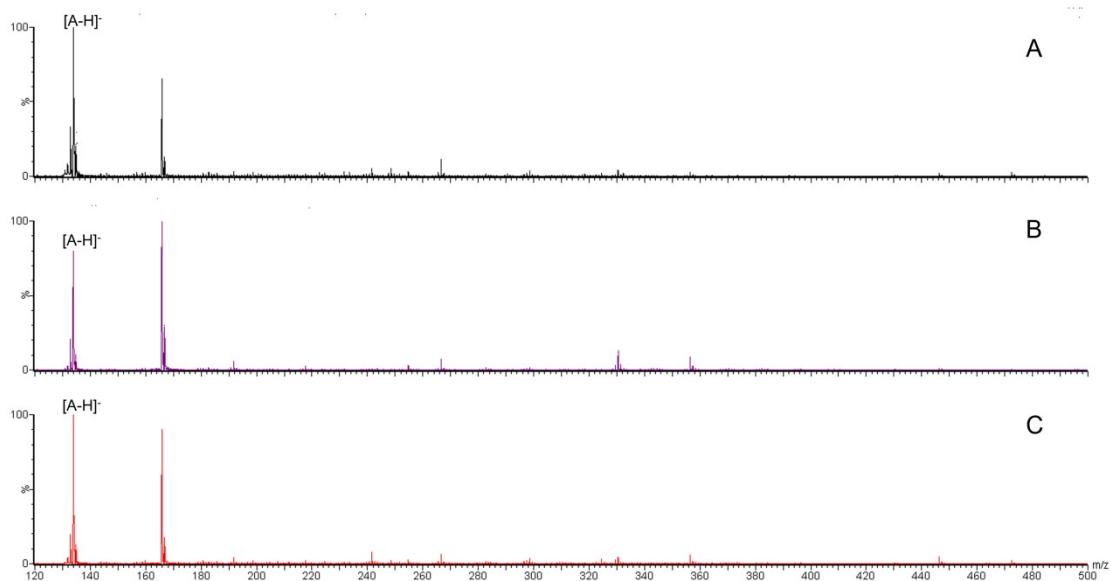

Fig. S7 MALDI-TOF MS spectrum of adenine with different spotting method included the sample first technique (A) the matrix first technique (B), and the dried-droplet technique (C) in negative ion mode

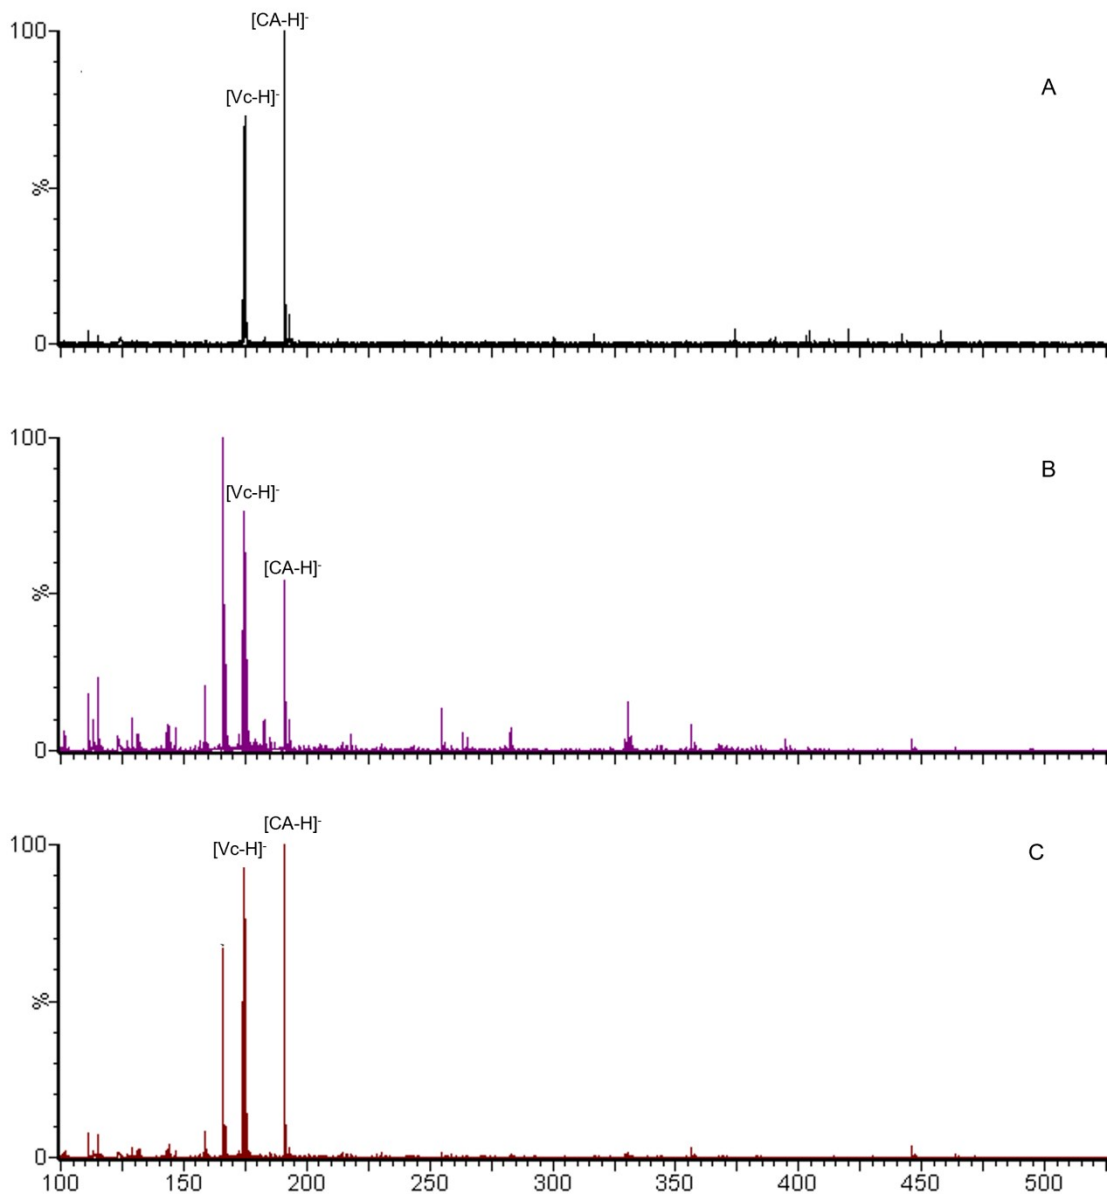

Fig. S8. MALDI-TOF MS spectrum of 1 mg/mL ascorbic acid and citric acid solution with 9-AA (A), VK(B), and PVK (C) matrix

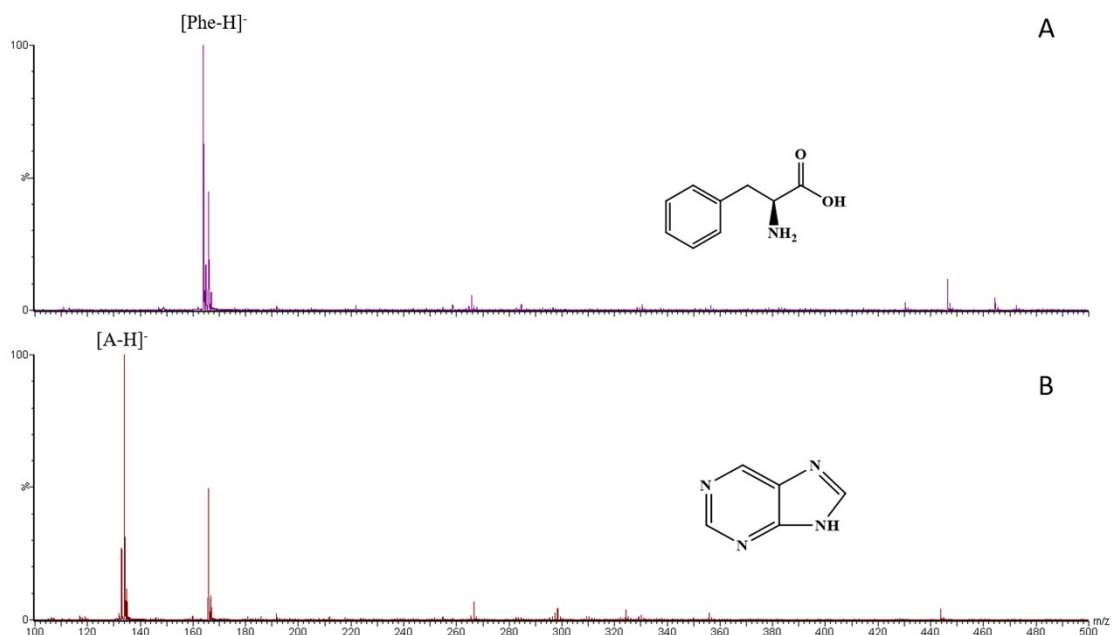

Fig. S9 MALDI-TOF MS spectrum of (A) phenylalanine and (B) adenine Using amorphous PVK as the matrix

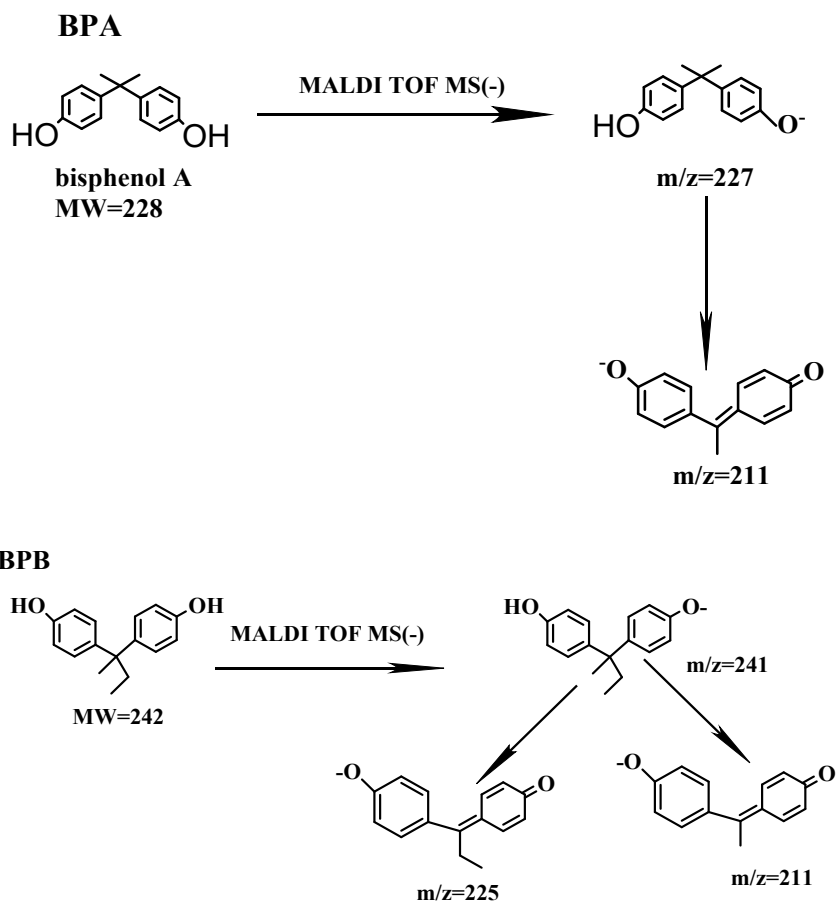

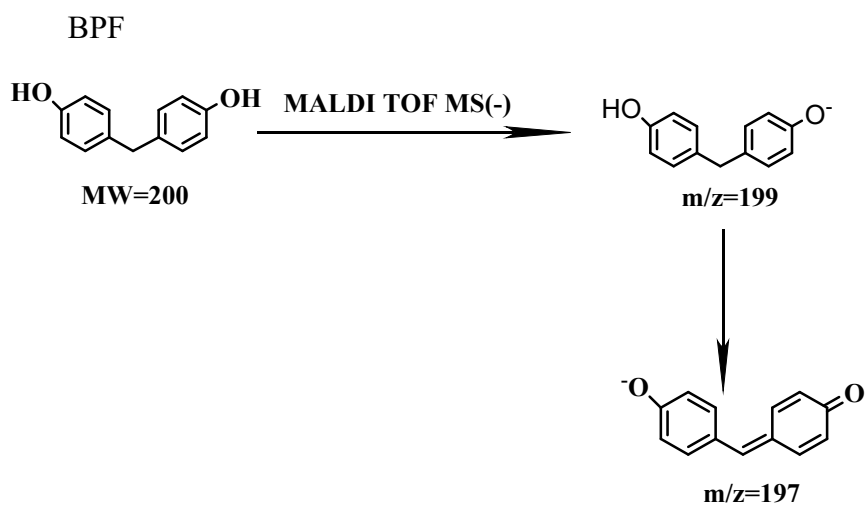

Fig.S10 Fragmentation pathways of BPs

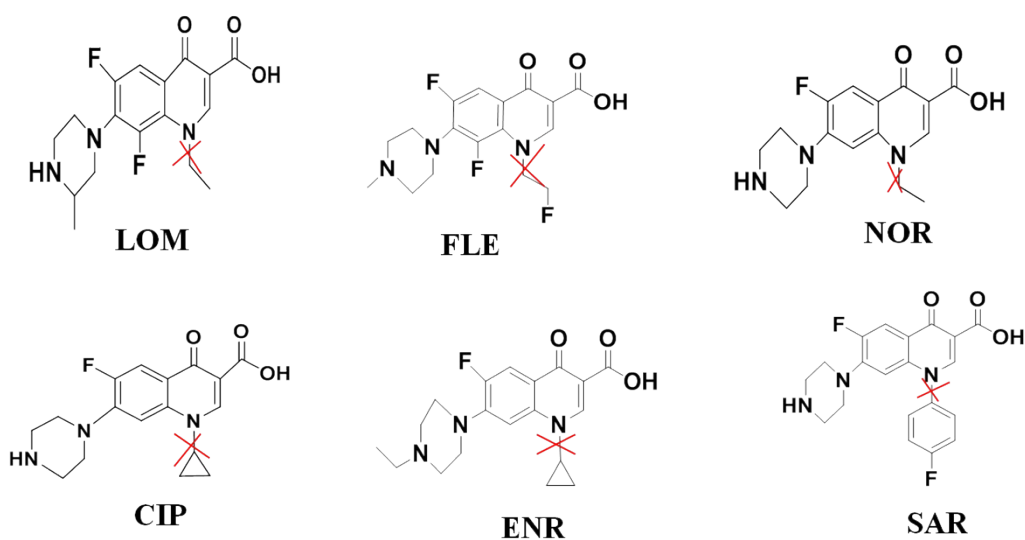

Fig. S11 Fragmentation pathways of quinolones

Table S2 The LOD of analytes measurement with the matrices of PVK.

| Analyte       | Detection limit (mg/mL) |
|---------------|-------------------------|
| ascorbic acid | 0.01                    |
| citric acid   | 0.001                   |
| phenylalanine | 0.001                   |



|                            |        |
|----------------------------|--------|
| methionine                 | 0.001  |
| threonine                  | 0.001  |
| adenine                    | 0.001  |
| uracil                     | 0.001  |
| thymine                    | 0.001  |
| stearic acid               | 0.001  |
| palmitic acid              | 0.001  |
| bisphenol A                | 0.0001 |
| bisphenol B                | 0.0001 |
| bisphenol F                | 0.001  |
| bisphenol S                | 0.0001 |
| lomefloxacin               | 0.001  |
| fleroxacin                 | 0.0001 |
| norfloxacin                | 0.001  |
| ciprofloxacin              | 0.001  |
| sarafloxacin hydrochloride | 0.001  |
| enrofloxacin               | 0.001  |

---
